# Supplementary material for: Caffsim: simulation of plasma caffeine concentrations implemented as an R package and Web-applications
Source: PubMed Central journal article supplement — Transl Clin Pharmacol. 2017 Sep 15;25(3):141–6. doi: 10.12793/tcp.2017.25.3.141 (PMC7033381; doi:10.12793/tcp.2017.25.3.141), 2017-09-15
Supplement: tcp-25-141-s001.pdf [file tcp-25-141-s001.pdf]

Supplementary Table 1

| Dose                          | Weight | Duration (hr) of concentration over 40 mg/L<br>Mean (SD) [range], proportion of subjects | Duration (hr) of concentration over 80 mg/L<br>Mean (SD) [range], proportion of subjects |
|-------------------------------|--------|------------------------------------------------------------------------------------------|------------------------------------------------------------------------------------------|
| 100 mg<br>every 2 hr, 4 times | 20 kg  | 0.00 (0.00) [0.00-0.00], 0%                                                              | 0.00 (0.00) [0.00-0.00], 0%                                                              |
|                               | 45 kg  | 0.00 (0.00) [0.00-0.00], 0%                                                              | 0.00 (0.00) [0.00-0.00], 0%                                                              |
|                               | 70 kg  | 0.00 (0.00) [0.00-0.00], 0%                                                              | 0.00 (0.00) [0.00-0.00], 0%                                                              |
|                               | 95 kg  | 0.00 (0.00) [0.00-0.00], 0%                                                              | 0.00 (0.00) [0.00-0.00], 0%                                                              |
| 250 mg<br>every 2 hr, 4 times | 20 kg  | 2.45 (2.89) [0.00-15.40], 65%                                                            | 0.01 (0.11) [0.00-2.30], 1%                                                              |
|                               | 45 kg  | 0.00 (0.00) [0.00-0.00], 0%                                                              | 0.00 (0.00) [0.00-0.00], 0%                                                              |
|                               | 70 kg  | 0.00 (0.00) [0.00-0.00], 0%                                                              | 0.00 (0.00) [0.00-0.00], 0%                                                              |
|                               | 95 kg  | 0.00 (0.00) [0.00-0.00], 0%                                                              | 0.00 (0.00) [0.00-0.00], 0%                                                              |
| 400 mg<br>every 2 hr, 4 times | 20 kg  | 8.13 (4.45) [0.00-26.50], 98%                                                            | 0.81 (1.93) [0.00-14.70], 28%                                                            |
|                               | 45 kg  | 0.44 (1.41) [0.00-12.60], 16%                                                            | 0.00 (0.00) [0.00-0.00], 0%                                                              |
|                               | 70 kg  | 0.01 (0.18) [0.00-4.00], 0%                                                              | 0.00 (0.00) [0.00-0.00], 0%                                                              |
|                               | 95 kg  | 0.00 (0.00) [0.00-0.00], 0%                                                              | 0.00 (0.00) [0.00-0.00], 0%                                                              |
| 550 mg<br>every 2 hr, 4 times | 20 kg  | 11.79 (4.62) [1.20-32.40], 100%                                                          | 3.30 (3.54) [0.00-19.20], 73%                                                            |
|                               | 45 kg  | 2.46 (3.12) [0.00-15.70], 60%                                                            | 0.01 (0.15) [0.00-2.70], 1%                                                              |
|                               | 70 kg  | 0.15 (0.66) [0.00-8.10], 9%                                                              | 0.00 (0.00) [0.00-0.00], 0%                                                              |
|                               | 95 kg  | 0.00 (0.00) [0.00-0.00], 0%                                                              | 0.00 (0.00) [0.00-0.00], 0%                                                              |

A descriptive summary on the duration (hour) of plasma caffeine concentration over certain levels (40 mg/L or 80 mg/L) previously known to cause serious toxicity. Values were generated by `caffOverdose` function for 500 subjects per each body weight group. (Abbreviations: SD, standard deviation)
